# Supplementary material
Source: PubMed Central journal article supplement (PMC5592722)
Supplement: NIHMS889812-supplement-Supplement1.pdf [file NIHMS889812-supplement-Supplement1.pdf]

## Supplementary Appendix

This appendix has been provided by the authors to give readers additional information about their work.

Supplement to: Mayer-Davis EJ, Lawrence JM, Dabelea D, et al. Incidence trends of type 1 and type 2 diabetes among youths, 2002–2012. *N Engl J Med* 2017;376:1419-29. DOI: [10.1056/NEJMoa1610187](https://doi.org/10.1056/NEJMoa1610187)

## APPENDIX

### Supplementary Materials

Trends in the Incidence of Type 1 and Type 2 Diabetes Diagnosed in Youth, 2002-2012:

The SEARCH for Diabetes in Youth Study

### TABLE OF CONTENTS

|                                                                                                                                          | PAGE |
|------------------------------------------------------------------------------------------------------------------------------------------|------|
| Acknowledgements .....                                                                                                                   | 2    |
| Table S1. Number of Type 1 and Type 2 Diabetes Cases By Incidence<br>Year (two-year moving averages): SEARCH for Diabetes in Youth ..... | 4    |
| Table S2. Denominators*for Estimation of Incidence of Type 1<br>Diabetes – Moving Averages (age 0-19) (counts in thousands) .....        | 6    |
| Table S3. Denominators* for Estimation of Incidence of Type 2<br>Diabetes – Moving Averages (counts in thousands) .....                  | 8    |
| Table S4. Type 1 Diabetes Incidence Rates Per 100,000/Year Using Two-<br>Year Moving Averages .....                                      | 9    |
| Table S5. Type 2 Diabetes Incidence Rates (Per 100,000/Year) Using<br>Two-Year Moving Averages .....                                     | 11   |

## **ACKNOWLEDGEMENTS**

The authors wish to acknowledge the involvement of the South Carolina Clinical & Translational Research Institute, at the Medical University of South Carolina, NIH/National Center for Advancing Translational Sciences (NCATS) grant number UL1 TR001450; Seattle Children's Hospital and the University of Washington, NIH/NCATS grant number UL1 TR00423; University of Colorado Pediatric Clinical and Translational Research Center, NIH/NCATS grant Number UL1 TR000154; the Barbara Davis Center at the University of Colorado at Denver (DERC NIH grant number P30 DK57516); the University of Cincinnati, NIH/NCATS grant number UL1 TR001425; and the Children with Medical Handicaps program managed by the Ohio Department of Health.

The writing group for this manuscript wishes to acknowledge the contributions of the following individuals to the SEARCH for Diabetes in Youth Study:

**California:** Jean M. Lawrence, ScD, MPH, MSSA; Corinna Koebnick, PhD, MSc; Kristi Reynolds, PhD, MPH; Kim Holmquist, MPHc; and Xia Li, MS for the Department of Research & Evaluation, Kaiser Permanente Southern California, Pasadena California, and David J. Pettitt, MD, Santa Barbara, California

**Colorado:** Dana Dabelea, MD, PhD, Richard F. Hamman, MD, DrPH, Lisa Testaverde, MS, Anna Bellatorre, PhD, for the Department of Epidemiology, Colorado School of Public Health, University of Colorado Denver, Georgeanna J. Klingensmith, MD, Marian J. Rewers, MD, PhD, David Maahs, MD and Paul Wadwa, MD for the Barbara Davis Center for Childhood Diabetes, Stephen Daniels, MD, PhD, Greta Wilkening, PsyD, Michael G. Kahn, MD, PhD, Department of Pediatrics and Children's Hospital, Clifford A. Bloch, MD, for the Pediatric Endocrine Associates, Jeffrey Powell, MD, MPH, for the Navajo Area Indian Health Promotion Program, Kathy Love-Osborne, MD, for the Denver Health and Hospital Authority

**Ohio:** Lawrence M. Dolan, MD and Debra A. Standiford, MSN, CNP for the Cincinnati Children's Hospital Medical Center

**Carolinas:** Elizabeth J. Mayer-Davis, PhD, Amy Mottl, MD, MPH, Joan Thomas MS, RD for the University of North Carolina, Chapel Hill, Anwar Merchant, ScD, Angela D. Liese, PhD, MPH, Malaka Jackson, MD, Lisa Knight, MD for the University of South Carolina, Deborah Bowlby, MD for the Medical University of South Carolina, James Amrhein, MD and Bryce Nelson, MD for Greenville Health System.

**Washington:** Catherine Pihoker, MD, Maryam Afkarian, MD, Irl Hirsch, MD, Lenna L. Liu, MD, MPH, John Neff, MD, Grace Kim, MD, Craig Taplin, MD, Debika Nandi-Munshi, MD, Joyce Yi-Frazier, PhD, Lina Merjaneh, MD, Davene Wright, PhD for the University of Washington, Beth Loots, MPH, MSW, Natalie Beauregard, BA, Sue Kearns, RN, Mary Klingsheim, RN, and Michael Pascual, BA for Seattle Children's Hospital, and Carla Greenbaum, MD for Benaroya Research Institute

**Centers for Disease Control and Prevention:** Giuseppina Imperatore, MD, PhD, Sharon H. Saydah, PhD.

**National Institute of Diabetes and Digestive and Kidney Diseases, NIH:** Barbara Linder, MD, PhD

**Central Laboratory:** Santica M. Marcovina, PhD, ScD, Vinod P. Gaur, PhD, Greg Strylewicz, PhD, and Jessica Harting for the University of Washington Northwest Lipid Research Laboratories

**Coordinating Center:** Ralph D'Agostino, Jr., PhD, Lynne E. Wagenknecht, DrPH, Ronny Bell, PhD, MS, Jasmin Divers, PhD, Timothy Morgan, PhD, Beth Reboussin, PhD, Leora Henkin, MPH, MEd, Maureen T. Goldstein, BA, Carrie Williams, MA, CCRP, Scott Isom, MS, Jeanette Stafford, MS, June Pierce, AB for Wake Forest School of Medicine

| Table S1. Number of Type 1 and Type 2 Diabetes Cases By Incidence Year (two-year moving averages): SEARCH for Diabetes in Youth |                       |       |       |         |         |         |         |         |         |         |
|---------------------------------------------------------------------------------------------------------------------------------|-----------------------|-------|-------|---------|---------|---------|---------|---------|---------|---------|
|                                                                                                                                 | Type 1 Diabetes Cases |       |       |         |         |         |         |         |         |         |
|                                                                                                                                 | 2003                  | 2004  | 2005  | 2006    | 2007    | 2008    | 2009    | 2010    | 2011    | 2012    |
| All                                                                                                                             | 938.5                 | 916.0 | 957.0 | 1,009.5 | 1,051.5 | 1,091.0 | 1,101.5 | 1,027.5 | 1,035.0 | 1,097.0 |
| Age at Diagnosis (years)                                                                                                        |                       |       |       |         |         |         |         |         |         |         |
| 0-4                                                                                                                             | 188.0                 | 183.5 | 167.5 | 169.0   | 168.5   | 170.0   | 177.5   | 169.0   | 172.0   | 175.0   |
| 5-9                                                                                                                             | 278.5                 | 273.5 | 300.0 | 318.0   | 343.0   | 362.0   | 362.0   | 339.0   | 335.5   | 349.5   |
| 10-14                                                                                                                           | 337.5                 | 339.0 | 358.0 | 376.0   | 379.0   | 395.0   | 397.0   | 361.0   | 369.0   | 405.0   |
| 15-19                                                                                                                           | 134.5                 | 120.0 | 131.5 | 146.5   | 161.0   | 164.0   | 165.0   | 158.5   | 158.5   | 167.5   |
| Sex                                                                                                                             |                       |       |       |         |         |         |         |         |         |         |
| Girls                                                                                                                           | 450.5                 | 448.5 | 454.5 | 469.5   | 498.5   | 524.5   | 529.0   | 486.5   | 482.0   | 493.5   |
| Boys                                                                                                                            | 488.0                 | 467.5 | 502.5 | 540.0   | 553.0   | 566.5   | 572.5   | 541.0   | 553.0   | 603.5   |
| Race/Ethnicity                                                                                                                  |                       |       |       |         |         |         |         |         |         |         |
| NHW                                                                                                                             | 694.3                 | 675.3 | 691.7 | 719.8   | 749.3   | 780.3   | 784.2   | 721.5   | 714.1   | 759.1   |
| NHB                                                                                                                             | 104.6                 | 113.0 | 121.9 | 115.1   | 117.2   | 128.4   | 119.7   | 112.4   | 126.5   | 136.8   |
| Hispanic                                                                                                                        | 112.4                 | 103.0 | 121.4 | 147.0   | 156.6   | 158.9   | 171.8   | 170.7   | 164.7   | 162.9   |
| API                                                                                                                             | 18.5                  | 17.3  | 17.1  | 21.6    | 22.1    | 17.8    | 19.4    | 16.1    | 22.6    | 30.3    |
| AI                                                                                                                              | 8.7                   | 7.4   | 5.1   | 6.0     | 6.3     | 5.5     | 6.4     | 6.8     | 7.1     | 7.9     |
| Site                                                                                                                            |                       |       |       |         |         |         |         |         |         |         |
| SC                                                                                                                              | 192.0                 | 190.5 | 204.0 | 205.0   | 223.0   | 245.5   | 242.0   | 232.5   | 231.0   | 225.0   |
| OH                                                                                                                              | 136.0                 | 149.5 | 138.0 | 129.0   | 132.0   | 135.5   | 134.5   | 139.5   | 142.5   | 143.0   |
| CO                                                                                                                              | 287.0                 | 267.0 | 279.0 | 304.5   | 328.5   | 344.0   | 357.0   | 319.5   | 308.0   | 343.5   |
| CA                                                                                                                              | 115.0                 | 107.5 | 127.5 | 142.0   | 138.5   | 130.5   | 133.0   | 136.0   | 133.5   | 138.0   |
| WA                                                                                                                              | 208.5                 | 201.5 | 208.5 | 229.0   | 229.5   | 235.5   | 235.0   | 200.0   | 220.0   | 247.5   |

|                                                                                                                                                      | Type 2 Diabetes Cases |       |       |       |       |       |       |       |       |       |
|------------------------------------------------------------------------------------------------------------------------------------------------------|-----------------------|-------|-------|-------|-------|-------|-------|-------|-------|-------|
| All                                                                                                                                                  | 225.5                 | 209.5 | 205.0 | 207.0 | 231.0 | 256.0 | 282.0 | 312.0 | 321.5 | 321.5 |
| Age at diagnosis (years)                                                                                                                             |                       |       |       |       |       |       |       |       |       |       |
| 10-14                                                                                                                                                | 102.5                 | 93.0  | 101.0 | 100.0 | 107.0 | 120.5 | 137.0 | 149.0 | 154.5 | 154.0 |
| 15-19                                                                                                                                                | 123.0                 | 116.5 | 104.0 | 107.0 | 124.0 | 135.5 | 145.0 | 163.0 | 167.0 | 167.5 |
| Sex                                                                                                                                                  |                       |       |       |       |       |       |       |       |       |       |
| Girls                                                                                                                                                | 136.0                 | 119.0 | 113.5 | 121.0 | 142.0 | 155.0 | 170.5 | 197.5 | 200.5 | 203.5 |
| Boys                                                                                                                                                 | 89.5                  | 90.5  | 91.5  | 86.0  | 89.0  | 101.0 | 111.5 | 114.5 | 121.0 | 118.0 |
| Race/Ethnicity                                                                                                                                       |                       |       |       |       |       |       |       |       |       |       |
| NHW                                                                                                                                                  | 67.1                  | 61.7  | 52.0  | 47.4  | 46.4  | 58.9  | 66.6  | 70.9  | 65.9  | 56.1  |
| NHB                                                                                                                                                  | 75.5                  | 73.3  | 73.8  | 72.1  | 84.7  | 91.9  | 99.3  | 114.6 | 116.6 | 118.8 |
| Hispanic                                                                                                                                             | 53.6                  | 52.3  | 58.6  | 64.9  | 76.8  | 78.3  | 81.7  | 85.3  | 93.7  | 98.6  |
| API                                                                                                                                                  | 13.4                  | 9.9   | 7.1   | 5.3   | 7.4   | 10.0  | 12.7  | 19.3  | 20.4  | 19.1  |
| AI                                                                                                                                                   | 15.8                  | 12.2  | 13.6  | 17.2  | 15.7  | 17.0  | 21.6  | 21.9  | 24.8  | 28.8  |
| Site                                                                                                                                                 |                       |       |       |       |       |       |       |       |       |       |
| SC                                                                                                                                                   | 59.5                  | 64.0  | 58.5  | 53.0  | 64.5  | 80.0  | 93.0  | 103.5 | 102.5 | 102.0 |
| OH                                                                                                                                                   | 33.5                  | 26.5  | 26.5  | 25.5  | 26.0  | 26.5  | 26.5  | 24.0  | 22.0  | 27.0  |
| CO                                                                                                                                                   | 40.5                  | 36.5  | 41.0  | 47.0  | 41.5  | 41.0  | 49.5  | 55.5  | 57.5  | 60.0  |
| CA                                                                                                                                                   | 61.0                  | 56.0  | 62.5  | 67.5  | 79.5  | 75.5  | 76.5  | 85.5  | 86.0  | 88.5  |
| WA                                                                                                                                                   | 31.0                  | 26.5  | 16.5  | 14.0  | 19.5  | 33.0  | 36.5  | 43.5  | 53.5  | 44.0  |
| Counts presented are the moving average calculated as the average of the number of cases observed for the given incident year and the preceding year |                       |       |       |       |       |       |       |       |       |       |

|                                                                                                                                                                           | 2003    | 2004    | 2005    | 2006    | 2007    | 2008    | 2009    | 2010    | 2011    | 2012    |
|---------------------------------------------------------------------------------------------------------------------------------------------------------------------------|---------|---------|---------|---------|---------|---------|---------|---------|---------|---------|
| All                                                                                                                                                                       | 4,807.1 | 4,798.7 | 4,813.7 | 4,863.5 | 4,916.0 | 4,956.1 | 5,002.2 | 5,034.2 | 5,051.1 | 5,058.9 |
| Age at diagnosis years)                                                                                                                                                   |         |         |         |         |         |         |         |         |         |         |
| 0-4                                                                                                                                                                       | 1,137.2 | 1,139.0 | 1,146.4 | 1,160.9 | 1,180.7 | 1,200.6 | 1,216.5 | 1,223.9 | 1,226.3 | 1,223.1 |
| 5-9                                                                                                                                                                       | 1,162.0 | 1,147.4 | 1,147.1 | 1,163.2 | 1,182.5 | 1,197.1 | 1,216.7 | 1,234.1 | 1,245.8 | 1,260.1 |
| 10-14                                                                                                                                                                     | 1,279.7 | 1,273.3 | 1,261.6 | 1,254.0 | 1,248.2 | 1,242.0 | 1,245.3 | 1,255.2 | 1,266.6 | 1,275.0 |
| 15-19                                                                                                                                                                     | 1,228.2 | 1,239.0 | 1,258.6 | 1,285.4 | 1,304.6 | 1,316.4 | 1,323.7 | 1,320.9 | 1,312.4 | 1,300.7 |
| Sex                                                                                                                                                                       |         |         |         |         |         |         |         |         |         |         |
| Girls                                                                                                                                                                     | 2,347.5 | 2,344.2 | 2,352.2 | 2,377.3 | 2,403.9 | 2,424.8 | 2,448.1 | 2,463.9 | 2,471.9 | 2,474.8 |
| Boys                                                                                                                                                                      | 2,459.6 | 2,454.5 | 2,461.5 | 2,486.2 | 2,512.1 | 2,531.3 | 2,554.0 | 2,570.3 | 2,579.2 | 2,584.1 |
| Race/Ethnicity                                                                                                                                                            |         |         |         |         |         |         |         |         |         |         |
| NHW                                                                                                                                                                       | 2,904.9 | 2,878.2 | 2,858.8 | 2,854.5 | 2,851.3 | 2,848.3 | 2,848.6 | 2,835.1 | 2,817.3 | 2,806.5 |
| NHB                                                                                                                                                                       | 714.3   | 711.3   | 709.8   | 713.1   | 718.0   | 721.8   | 725.8   | 726.2   | 722.9   | 719.7   |
| Hispanic                                                                                                                                                                  | 822.0   | 842.5   | 873.7   | 914.3   | 956.1   | 987.6   | 1,018.0 | 1,052.1 | 1,082.0 | 1,099.8 |
| API                                                                                                                                                                       | 235.3   | 237.7   | 242.8   | 253.2   | 263.6   | 271.8   | 280.8   | 293.8   | 305.2   | 311.1   |
| AI                                                                                                                                                                        | 130.6   | 129.0   | 128.7   | 128.4   | 127.0   | 126.6   | 129.0   | 127.0   | 123.6   | 121.8   |
| Site                                                                                                                                                                      |         |         |         |         |         |         |         |         |         |         |
| SC                                                                                                                                                                        | 1,139.5 | 1,147.5 | 1,155.0 | 1,167.1 | 1,184.3 | 1,201.3 | 1,213.7 | 1,219.1 | 1,215.6 | 1,210.4 |
| OH                                                                                                                                                                        | 551.6   | 552.4   | 553.1   | 553.8   | 555.2   | 556.1   | 556.2   | 554.8   | 551.5   | 548.3   |
| CO                                                                                                                                                                        | 1,367.5 | 1,371.0 | 1,377.6 | 1,390.7 | 1,406.1 | 1,423.4 | 1,442.6 | 1,452.9 | 1,456.6 | 1,458.9 |
| CA                                                                                                                                                                        | 793.7   | 772.6   | 770.7   | 788.8   | 797.9   | 793.4   | 796.5   | 808.3   | 828.1   | 840.4   |
| WA                                                                                                                                                                        | 954.7   | 955.2   | 957.3   | 963.1   | 972.5   | 981.9   | 993.1   | 999.1   | 999.2   | 1,000.8 |
| *Counts presented are the average of the number at risk in the given year and the preceding year. Denominators were determined as: SC, OH, CO, WA from US Census data; CA |         |         |         |         |         |         |         |         |         |         |

from membership rolls; and IHS user population for participating AI reservations

| <b>Table S3. Denominators* for Estimation of Incidence of Type 2 Diabetes – Moving Averages (counts in thousands)</b>                                                                                                                                         |         |         |         |         |         |         |         |         |         |         |
|---------------------------------------------------------------------------------------------------------------------------------------------------------------------------------------------------------------------------------------------------------------|---------|---------|---------|---------|---------|---------|---------|---------|---------|---------|
|                                                                                                                                                                                                                                                               | 2003    | 2004    | 2005    | 2006    | 2007    | 2008    | 2009    | 2010    | 2011    | 2012    |
| All                                                                                                                                                                                                                                                           | 2,508.0 | 2,512.3 | 2,520.2 | 2,539.4 | 2,552.8 | 2,558.4 | 2,569.0 | 2,576.1 | 2,579.0 | 2,575.7 |
| Age at diagnosis (years)                                                                                                                                                                                                                                      |         |         |         |         |         |         |         |         |         |         |
| 10-14                                                                                                                                                                                                                                                         | 1,279.7 | 1,273.3 | 1,261.6 | 1,254.0 | 1,248.2 | 1,242.0 | 1,245.3 | 1,255.2 | 1,266.6 | 1,275.0 |
| 15-19                                                                                                                                                                                                                                                         | 1,228.2 | 1,239.0 | 1,258.6 | 1,285.4 | 1,304.6 | 1,316.4 | 1,323.7 | 1,320.9 | 1,312.4 | 1,300.7 |
| Sex                                                                                                                                                                                                                                                           |         |         |         |         |         |         |         |         |         |         |
| Girls                                                                                                                                                                                                                                                         | 1,224.6 | 1,227.4 | 1,231.9 | 1,241.2 | 1,247.7 | 1,250.9 | 1,256.5 | 1,260.3 | 1,261.6 | 1,259.7 |
| Boys                                                                                                                                                                                                                                                          | 1,283.3 | 1,284.9 | 1,288.2 | 1,298.2 | 1,305.1 | 1,307.5 | 1,312.5 | 1,315.8 | 1,317.3 | 1,316.0 |
| Race/Ethnicity                                                                                                                                                                                                                                                |         |         |         |         |         |         |         |         |         |         |
| NHW                                                                                                                                                                                                                                                           | 1,536.5 | 1,527.0 | 1,516.5 | 1,511.4 | 1,503.5 | 1,494.3 | 1,487.7 | 1,475.1 | 1,461.7 | 1,451.8 |
| NHB                                                                                                                                                                                                                                                           | 377.0   | 378.8   | 379.5   | 380.3   | 379.6   | 377.7   | 376.1   | 373.1   | 369.1   | 364.7   |
| Hispanic                                                                                                                                                                                                                                                      | 402.8   | 414.2   | 429.6   | 448.3   | 466.6   | 479.9   | 494.1   | 512.7   | 530.3   | 540.8   |
| API                                                                                                                                                                                                                                                           | 121.7   | 122.8   | 125.2   | 130.4   | 135.5   | 139.3   | 143.4   | 149.1   | 154.1   | 156.5   |
| AI                                                                                                                                                                                                                                                            | 70.0    | 69.6    | 69.5    | 68.9    | 67.7    | 67.2    | 67.8    | 66.1    | 63.7    | 62.0    |
| Site                                                                                                                                                                                                                                                          |         |         |         |         |         |         |         |         |         |         |
| SC                                                                                                                                                                                                                                                            | 594.5   | 601.2   | 604.5   | 608.9   | 613.8   | 617.4   | 620.2   | 621.8   | 618.8   | 613.9   |
| OH                                                                                                                                                                                                                                                            | 283.3   | 284.0   | 284.1   | 284.2   | 283.8   | 282.8   | 281.9   | 280.4   | 278.6   | 277.3   |
| CO                                                                                                                                                                                                                                                            | 698.9   | 700.4   | 701.8   | 704.3   | 706.4   | 710.0   | 715.6   | 717.9   | 719.7   | 722.5   |
| CA                                                                                                                                                                                                                                                            | 438.0   | 431.2   | 433.2   | 444.1   | 448.9   | 446.6   | 447.6   | 453.4   | 463.7   | 468.4   |
| WA                                                                                                                                                                                                                                                            | 493.2   | 495.5   | 496.5   | 497.9   | 499.8   | 501.6   | 503.7   | 502.6   | 498.2   | 493.6   |
| *Counts presented are the average of the number at risk in the given year and the preceding year. Denominators were determined as:<br>SC, OH, CO, WA from US Census data; CA from membership rolls; and IHS user population for participating AI reservations |         |         |         |         |         |         |         |         |         |         |

| Table S4 Type 1 Diabetes Incidence Rates Per 100,000/Year Using Two-Year Moving Averages |                     |                     |                     |                     |                     |                     |                     |                     |                     |                     | Unadjusted Models          |               | Adjusted Models***         |               |
|------------------------------------------------------------------------------------------|---------------------|---------------------|---------------------|---------------------|---------------------|---------------------|---------------------|---------------------|---------------------|---------------------|----------------------------|---------------|----------------------------|---------------|
|                                                                                          | 2003                | 2004                | 2005                | 2006                | 2007                | 2008                | 2009                | 2010                | 2011                | 2012                | % Annual Increase (95% CI) | P for trend** | % Annual Increase (95% CI) | P for trend** |
| Moving Average Incidence Rates (unadjusted per 100,000/yr; 95% CI)*                      |                     |                     |                     |                     |                     |                     |                     |                     |                     |                     |                            |               |                            |               |
| All                                                                                      | 19.5<br>(18.3,20.8) | 19.1<br>(17.9,20.4) | 19.9<br>(18.7,21.2) | 20.8<br>(19.5,22.1) | 21.4<br>(20.1,22.7) | 22.0<br>(20.7,23.4) | 22.0<br>(20.8,23.4) | 20.4<br>(19.2,21.7) | 20.5<br>(19.3,21.8) | 21.7<br>(20.4,23.0) | 1.4<br>(0.1,2.8)           | 0.0338        | 1.8<br>(1.0,2.6)           | <0.0001       |
| Age at diagnosis (years)                                                                 |                     |                     |                     |                     |                     |                     |                     |                     |                     |                     |                            |               |                            |               |
| 0-4                                                                                      | 16.5<br>(14.3,19.1) | 16.1<br>(13.9,18.6) | 14.6<br>(12.6,17.0) | 14.6<br>(12.5,16.9) | 14.3<br>(12.3,16.6) | 14.2<br>(12.2,16.5) | 14.6<br>(12.6,16.9) | 13.8<br>(11.9,16.1) | 14.0<br>(12.1,16.3) | 14.3<br>(12.3,16.6) | -1.5<br>(-2.9,-0.1)        | 0.0318+       | -1.2<br>(-2.6,0.2)         | 0.0954+       |
| 5-9                                                                                      | 24.0<br>(21.3,27.0) | 23.8<br>(21.2,26.8) | 26.2<br>(23.4,29.3) | 27.3<br>(24.5,30.5) | 29.0<br>(26.1,32.2) | 30.2<br>(27.3,33.5) | 29.8<br>(26.8,33.0) | 27.5<br>(24.7,30.6) | 26.9<br>(24.2,30.0) | 27.7<br>(25.0,30.8) | 1.7<br>(0.0,3.4)           | 0.0484        | 2.5<br>(1.1,3.9)           | 0.0004        |
| 10-14                                                                                    | 26.4<br>(23.7,29.3) | 26.6<br>(23.9,29.6) | 28.4<br>(25.6,31.5) | 30.0<br>(27.1,33.2) | 30.4<br>(27.5,33.6) | 31.8<br>(28.8,35.1) | 31.9<br>(28.9,35.2) | 28.8<br>(25.9,31.9) | 29.1<br>(26.3,32.3) | 31.8<br>(28.8,35.0) | 1.2<br>(-0.5,2.9)          | 0.1682        | 2.1<br>(0.5,3.7)           | 0.0090        |
| 15-19                                                                                    | 11.0<br>(9.2,13.0)  | 9.7<br>(8.1,11.6)   | 10.4<br>(8.8,12.4)  | 11.4<br>(9.7,13.4)  | 12.3<br>(10.6,14.4) | 12.5<br>(10.7,14.5) | 12.5<br>(10.7,14.5) | 12.0<br>(10.3,14.0) | 12.1<br>(10.3,14.1) | 12.9<br>(11.1,15.0) | 1.8<br>(0.2,3.4)           | 0.0253+       | 2.1<br>(0.5,3.6)           | 0.0091+       |
| Sex                                                                                      |                     |                     |                     |                     |                     |                     |                     |                     |                     |                     |                            |               |                            |               |
| Girls                                                                                    | 19.2<br>(17.5,21.0) | 19.1<br>(17.4,21.0) | 19.3<br>(17.6,21.2) | 19.7<br>(18.0,21.6) | 20.7<br>(19.0,22.6) | 21.6<br>(19.9,23.6) | 21.6<br>(19.8,23.5) | 19.7<br>(18.1,21.6) | 19.5<br>(17.8,21.3) | 19.9<br>(18.3,21.8) | 0.7<br>(-0.9,2.3)          | 0.3990        | 1.4<br>(0.3,2.5)           | 0.0119        |
| Boys                                                                                     | 19.8<br>(18.2,21.7) | 19.0<br>(17.4,20.9) | 20.4<br>(18.7,22.3) | 21.7<br>(20.0,23.6) | 22.0<br>(20.3,23.9) | 22.4<br>(20.6,24.3) | 22.4<br>(20.7,24.3) | 21.0<br>(19.3,22.9) | 21.4<br>(19.7,23.3) | 23.4<br>(21.6,25.3) | 2.1<br>(0.7,3.5)           | 0.0026        | 2.2<br>(1.3,3.1)           | <0.0001       |
| Race and Ethnicity                                                                       |                     |                     |                     |                     |                     |                     |                     |                     |                     |                     |                            |               |                            |               |

|          |                     |                     |                     |                     |                     |                     |                     |                     |                     |                     |                    |         |                   |         |
|----------|---------------------|---------------------|---------------------|---------------------|---------------------|---------------------|---------------------|---------------------|---------------------|---------------------|--------------------|---------|-------------------|---------|
| NHW      | 23.9<br>(22.2,25.7) | 23.5<br>(21.8,25.3) | 24.2<br>(22.5,26.1) | 25.2<br>(23.4,27.1) | 26.3<br>(24.5,28.2) | 27.4<br>(25.5,29.4) | 27.5<br>(25.7,29.5) | 25.4<br>(23.7,27.4) | 25.3<br>(23.6,27.3) | 27.0<br>(25.2,29.0) | 0.8<br>(-0.5,2.2)  | 0.2188  | 1.2<br>(0.2,2.2)  | 0.0205  |
| NHB      | 14.7<br>(12.1,17.7) | 15.9<br>(13.2,19.1) | 17.2<br>(14.4,20.5) | 16.1<br>(13.5,19.4) | 16.3<br>(13.6,19.6) | 17.8<br>(15.0,21.1) | 16.5<br>(13.8,19.7) | 15.5<br>(12.9,18.6) | 17.5<br>(14.7,20.8) | 19.0<br>(16.1,22.5) | 1.4<br>(-1.0,3.8)  | 0.2653  | 2.2<br>(0.4,4.1)  | 0.0177  |
| Hispanic | 13.7<br>(11.4,16.4) | 12.2<br>(10.1,14.8) | 13.9<br>(11.6,16.6) | 16.1<br>(13.7,18.9) | 16.4<br>(14.0,19.1) | 16.1<br>(13.8,18.8) | 16.9<br>(14.5,19.6) | 16.2<br>(14.0,18.8) | 15.2<br>(13.1,17.7) | 14.8<br>(12.7,17.3) | 3.7<br>(0.9,6.6)   | 0.0092  | 4.2<br>(2.5,5.9)  | <0.0001 |
| API      | 7.9<br>(5.0,12.3)   | 7.3<br>(4.6,11.6)   | 7.0<br>(4.4,11.2)   | 8.5<br>(5.6,12.9)   | 8.4<br>(5.5,12.7)   | 6.6<br>(4.1,10.4)   | 6.9<br>(4.4,10.7)   | 5.5<br>(3.4,8.9)    | 7.4<br>(4.9,11.2)   | 9.7<br>(6.8,13.9)   | 4.1<br>(-2.1,10.6) | 0.2023  | 3.7<br>(-0.5,8.1) | 0.0832  |
| NA       | 6.6<br>(3.5,12.8)   | 5.7<br>(2.8,11.6)   | 3.9<br>(1.7,9.1)    | 4.7<br>(2.1,10.2)   | 5.0<br>(2.3,10.7)   | 4.4<br>(1.9,9.8)    | 5.0<br>(2.3,10.6)   | 5.4<br>(2.6,11.2)   | 5.7<br>(2.8,11.8)   | 6.5<br>(3.3,12.9)   | 1.4<br>(-5.6,8.9)  | 0.7100+ | 0.4<br>(-6.5,7.7) | 0.9223  |
| Site     |                     |                     |                     |                     |                     |                     |                     |                     |                     |                     |                    |         |                   |         |
| SC       | 16.8<br>(14.6,19.4) | 16.6<br>(14.4,19.1) | 17.7<br>(15.4,20.3) | 17.6<br>(15.3,20.1) | 18.8<br>(16.5,21.5) | 20.4<br>(18.0,23.2) | 19.9<br>(17.6,22.6) | 19.1<br>(16.8,21.7) | 19.0<br>(16.7,21.6) | 18.6<br>(16.3,21.2) | 1.4<br>(-0.4,3.3)  | 0.1299  | 2.2<br>(0.6,3.8)  | 0.0082  |
| OH       | 24.7<br>(20.8,29.2) | 27.1<br>(23.1,31.8) | 25.0<br>(21.1,29.5) | 23.3<br>(19.6,27.7) | 23.8<br>(20.1,28.2) | 24.4<br>(20.6,28.8) | 24.2<br>(20.4,28.6) | 25.1<br>(21.3,29.7) | 25.8<br>(21.9,30.4) | 26.1<br>(22.1,30.7) | 0.7<br>(-0.9,2.3)  | 0.4120+ | 0.9<br>(-0.7,2.5) | 0.2714+ |
| CO       | 21.0<br>(18.7,23.6) | 19.5<br>(17.3,22.0) | 20.3<br>(18.0,22.8) | 21.9<br>(19.6,24.5) | 23.4<br>(21.0,26.0) | 24.2<br>(21.7,26.9) | 24.7<br>(22.3,27.4) | 22.0<br>(19.7,24.5) | 21.1<br>(18.9,23.6) | 23.5<br>(21.2,26.2) | 2.2<br>(-0.3,4.6)  | 0.0815  | 1.6<br>(0.4,2.9)  | 0.0100+ |
| CA       | 14.5<br>(12.1,17.4) | 13.9<br>(11.5,16.8) | 16.5<br>(13.9,19.7) | 18.0<br>(15.3,21.2) | 17.4<br>(14.7,20.5) | 16.4<br>(13.9,19.5) | 16.7<br>(14.1,19.8) | 16.8<br>(14.2,19.9) | 16.1<br>(13.6,19.1) | 16.4<br>(13.9,19.4) | 0.9<br>(-1.4,3.2)  | 0.4544  | 2.0<br>(0.2,3.8)  | 0.0281  |
| WA       | 21.8<br>(19.1,25.0) | 21.1<br>(18.4,24.2) | 21.8<br>(19.0,24.9) | 23.8<br>(20.9,27.1) | 23.6<br>(20.7,26.9) | 24.0<br>(21.1,27.2) | 23.7<br>(20.8,26.9) | 20.0<br>(17.4,23.0) | 22.0<br>(19.3,25.1) | 24.7<br>(21.8,28.0) | 1.1<br>(-1.2,3.5)  | 0.3595  | 1.5<br>(0.2,2.8)  | 0.0230+ |

\* {q49}Rates were based on the number of cases and the number at risk in the given year and the preceding year (2-year moving average). P values are from a generalized autoregressive moving average (GARMA) linear model unless otherwise noted. The 95% confidence intervals for the yearly data are provided in Table S4 in the Supplementary Appendix. CI denotes confidence interval.

† The analysis was adjusted for age, sex, and race or ethnic group (age was adjusted for sex and race or ethnic group; sex was adjusted for age and race or ethnic group; race or ethnic

group was adjusted for age and sex; and study site was adjusted for age, sex, and race or ethnic group).

‡ P values are from linear negative binomial model, because the GARMA model was unable to estimate them.

| Table S5. Type 2 Diabetes Incidence Rates (Per 100,000/Year) Using Two-Year Moving Averages |                    |                   |                   |                   |                    |                     |                     |                     |                     |                     | Unadjusted Models          |               | Adjusted Models***         |               |
|---------------------------------------------------------------------------------------------|--------------------|-------------------|-------------------|-------------------|--------------------|---------------------|---------------------|---------------------|---------------------|---------------------|----------------------------|---------------|----------------------------|---------------|
|                                                                                             | 2003               | 2004              | 2005              | 2006              | 2007               | 2008                | 2009                | 2010                | 2011                | 2012                | % Annual Increase (95% CI) | P for trend** | % Annual Increase (95% CI) | P for trend** |
| Moving Average Raw Incidence Rates (unadjusted per 100,000/yr; 95% CI)*                     |                    |                   |                   |                   |                    |                     |                     |                     |                     |                     |                            |               |                            |               |
| All                                                                                         | 9.0<br>(7.9,10.2)  | 8.3<br>(7.3,9.5)  | 8.1<br>(7.1,9.3)  | 8.2<br>(7.1,9.3)  | 9.0<br>(8.0,10.3)  | 10.0<br>(8.9,11.3)  | 11.0<br>(9.8,12.3)  | 12.1<br>(10.8,13.5) | 12.5<br>(11.2,13.9) | 12.5<br>(11.2,13.9) | 7.1<br>(5.2,9.0)           | <0.0001       | 4.8<br>(3.2,6.4)           | <0.0001       |
| Age at diagnosis (years)                                                                    |                    |                   |                   |                   |                    |                     |                     |                     |                     |                     |                            |               |                            |               |
| 10-14                                                                                       | 8.0<br>(6.6,9.7)   | 7.3<br>(6.0,8.9)  | 8.0<br>(6.6,9.7)  | 8.0<br>(6.6,9.7)  | 8.6<br>(7.1,10.4)  | 9.7<br>(8.1,11.6)   | 11.0<br>(9.3,13.0)  | 11.9<br>(10.1,13.9) | 12.2<br>(10.4,14.3) | 12.1<br>(10.3,14.1) | 6.8<br>(4.3,9.4)           | <0.0001       | 5.1<br>(3.1,7.2)           | <0.0001       |
| 15-19                                                                                       | 10.0<br>(8.4,11.9) | 9.4<br>(7.8,11.3) | 8.3<br>(6.8,10.0) | 8.3<br>(6.9,10.1) | 9.5<br>(8.0,11.3)  | 10.3<br>(8.7,12.2)  | 11.0<br>(9.3,12.9)  | 12.3<br>(10.6,14.4) | 12.7<br>(10.9,14.8) | 12.9<br>(11.1,15.0) | 4.3<br>(2.5,6.2)           | <0.0001+      | 5.2<br>(3.2,7.2)           | <0.0001       |
| Sex                                                                                         |                    |                   |                   |                   |                    |                     |                     |                     |                     |                     |                            |               |                            |               |
| Girls                                                                                       | 11.1<br>(9.4,13.1) | 9.7<br>(8.1,11.6) | 9.2<br>(7.7,11.1) | 9.7<br>(8.2,11.6) | 11.4<br>(9.7,13.4) | 12.4<br>(10.6,14.5) | 13.6<br>(11.7,15.8) | 15.7<br>(13.6,18.0) | 15.9<br>(13.8,18.2) | 16.2<br>(14.1,18.5) | 9.0<br>(6.6,11.5)          | <0.0001       | 6.2<br>(4.2,8.2)           | <0.0001       |
| Boys                                                                                        | 7.0<br>(5.7,8.6)   | 7.0<br>(5.7,8.7)  | 7.1<br>(5.8,8.7)  | 6.6<br>(5.4,8.2)  | 6.8<br>(5.5,8.4)   | 7.7<br>(6.4,9.4)    | 8.5<br>(7.1,10.2)   | 8.7<br>(7.2,10.4)   | 9.2<br>(7.7,11.0)   | 9.0<br>(7.5,10.7)   | 4.2<br>(1.5,6.9)           | 0.0020        | 3.7<br>(1.6,5.8)           | 0.0004        |
| Race and Ethnicity                                                                          |                    |                   |                   |                   |                    |                     |                     |                     |                     |                     |                            |               |                            |               |

|          |                     |                     |                     |                     |                     |                     |                     |                     |                     |                     |                    |          |                    |         |
|----------|---------------------|---------------------|---------------------|---------------------|---------------------|---------------------|---------------------|---------------------|---------------------|---------------------|--------------------|----------|--------------------|---------|
| NHW      | 4.4<br>(3.4,5.5)    | 4.0<br>(3.2,5.2)    | 3.4<br>(2.6,4.5)    | 3.1<br>(2.4,4.2)    | 3.1<br>(2.3,4.1)    | 3.9<br>(3.1,5.1)    | 4.5<br>(3.5,5.7)    | 4.8<br>(3.8,6.1)    | 4.5<br>(3.5,5.7)    | 3.9<br>(3.0,5.0)    | 3.3<br>(-0.4,7.1)  | 0.0818   | 0.6<br>(-2.0,3.4)  | 0.6501  |
| NHB      | 20.0<br>(16.0,25.1) | 19.4<br>(15.4,24.3) | 19.4<br>(15.5,24.4) | 19.0<br>(15.1,23.9) | 22.3<br>(18.0,27.6) | 24.3<br>(19.8,29.8) | 26.4<br>(21.7,32.1) | 30.7<br>(25.6,36.9) | 31.6<br>(26.4,37.9) | 32.6<br>(27.2,39.0) | 6.6<br>(4.5,8.7)   | <0.0001+ | 6.3<br>(4.0,8.8)   | <0.0001 |
| Hispanic | 13.3<br>(10.2,17.4) | 12.6<br>(9.6,16.6)  | 13.6<br>(10.6,17.6) | 14.5<br>(11.4,18.5) | 16.5<br>(13.2,20.6) | 16.3<br>(13.1,20.4) | 16.5<br>(13.3,20.5) | 16.6<br>(13.5,20.6) | 17.7<br>(14.4,21.6) | 18.2<br>(15.0,22.2) | 6.6<br>(3.6,9.7)   | <0.0001  | 3.1<br>(0.8,5.4)   | 0.0067+ |
| API      | 11.0<br>(6.5,18.7)  | 8.1<br>(4.4,14.9)   | 5.7<br>(2.8,11.7)   | 4.1<br>(1.8,9.3)    | 5.4<br>(2.7,11.0)   | 7.2<br>(3.9,13.2)   | 8.9<br>(5.2,15.3)   | 12.9<br>(8.3,20.2)  | 13.2<br>(8.6,20.4)  | 12.2<br>(7.8,19.1)  | 16.0<br>(7.0,25.7) | 0.0003   | 8.5<br>(2.0,15.4)  | 0.0092  |
| NA       | 22.6<br>(13.9,36.8) | 17.6<br>(10.1,30.6) | 19.6<br>(11.6,33.1) | 24.9<br>(15.6,39.8) | 23.2<br>(14.2,37.8) | 25.3<br>(15.8,40.5) | 31.8<br>(20.9,48.4) | 33.1<br>(21.8,50.1) | 39.0<br>(26.4,57.6) | 46.5<br>(32.4,66.9) | 9.5<br>(4.8,14.4)  | <0.0001+ | 8.9<br>(5.0,13.1)  | <0.0001 |
| Site     |                     |                     |                     |                     |                     |                     |                     |                     |                     |                     |                    |          |                    |         |
| SC       | 10.0<br>(7.8,12.9)  | 10.6<br>(8.3,13.6)  | 9.7<br>(7.5,12.5)   | 8.7<br>(6.7,11.4)   | 10.5<br>(8.2,13.4)  | 13.0<br>(10.4,16.1) | 15.0<br>(12.2,18.4) | 16.6<br>(13.7,20.2) | 16.6<br>(13.7,20.1) | 16.6<br>(13.7,20.2) | 9.2<br>(5.9,12.6)  | <0.0001  | 7.5<br>(4.9,10.1)  | <0.0001 |
| OH       | 11.8<br>(8.4,16.6)  | 9.3<br>(6.4,13.6)   | 9.3<br>(6.4,13.6)   | 9.0<br>(6.1,13.2)   | 9.2<br>(6.3,13.4)   | 9.4<br>(6.4,13.7)   | 9.4<br>(6.4,13.7)   | 8.6<br>(5.8,12.7)   | 7.9<br>(5.2,12.0)   | 9.7<br>(6.7,14.2)   | -2.3<br>(-5.8,1.3) | 0.2020+  | -2.6<br>(-6.3,1.2) | 0.1806+ |
| CO       | 5.8<br>(4.3,7.9)    | 5.2<br>(3.8,7.2)    | 5.8<br>(4.3,7.9)    | 6.7<br>(5.0,8.9)    | 5.9<br>(4.3,8.0)    | 5.8<br>(4.3,7.8)    | 6.9<br>(5.2,9.1)    | 7.7<br>(5.9,10.0)   | 8.0<br>(6.2,10.3)   | 8.3<br>(6.5,10.7)   | 4.6<br>(1.8,7.5)   | 0.0012+  | 5.1<br>(2.2,8.1)   | 0.0005  |
| CA       | 13.9<br>(10.8,17.9) | 13.0<br>(10.0,16.9) | 14.4<br>(11.3,18.5) | 15.2<br>(12.0,19.3) | 17.7<br>(14.2,22.1) | 16.9<br>(13.5,21.2) | 17.1<br>(13.7,21.4) | 18.9<br>(15.3,23.3) | 18.5<br>(15.0,22.9) | 18.9<br>(15.3,23.3) | 4.3<br>(1.3,7.4)   | 0.0042   | 2.8<br>(0.6,5.1)   | 0.0137+ |
| WA       | 6.3<br>(4.4,8.9)    | 5.3<br>(3.7,7.8)    | 3.3<br>(2.1,5.4)    | 2.8<br>(1.7,4.7)    | 3.9<br>(2.5,6.1)    | 6.6<br>(4.7,9.2)    | 7.2<br>(5.2,10.0)   | 8.7<br>(6.4,11.6)   | 10.7<br>(8.2,14.0)  | 8.9<br>(6.6,12.0)   | 15.1<br>(6.5,24.4) | 0.0004   | 7.9<br>(3.5,12.4)  | 0.0003+ |

\* Rates were based on the number of cases and the number at risk in the given year and the preceding year (2-year moving average). P values are from the GARMA linear model unless otherwise noted. The 95% confidence intervals for the yearly data are provided in Table S5 in the Supplementary Appendix.

† The analysis was adjusted for age, sex, and race or ethnic group (age was adjusted for sex and race or ethnic group; sex was adjusted for age and race or ethnic group; race or ethnic group was adjusted for age and sex; and study site was adjusted for age, sex, and race or ethnic group).

‡ P values are from linear negative binomial model, because the GARMA model was unable to estimate them.
